# Supplementary material
Source: PubMed Central journal article supplement (PMC2631612)
Supplement: NIHMS80332-supplement-supplement_1.pdf [file NIHMS80332-supplement-supplement_1.pdf]

## SUPPLEMENT (ONLINE ONLY)

### On-line Appendix Tables

Appendix Table 1. Percent Age and Sex Specific Underlying Cause of Death by CHS and Nosologist, N=3194

|           | 65-74 years |             | 75-79 years |             | 80-84 years |             | 85-89 years |             | 90-94 years |             | 95+ years   |             |
|-----------|-------------|-------------|-------------|-------------|-------------|-------------|-------------|-------------|-------------|-------------|-------------|-------------|
|           | N=140       |             | N=306       |             | N=449       |             | N=375       |             | N=225       |             | N=79        |             |
|           | CHS<br>N(%) | ICD<br>N(%) |
|           | 57          | 52          | 92          | 91          | 127         | 123         | 104         | 108         | 58          | 66          | 29          | 30          |
| CHD       | (40.7)      | (37.1)      | (30.1)      | (29.8)      | (28.3)      | (27.4)      | (27.7)      | (28.8)      | (25.8)      | (29.4)      | (36.7)      | (37.9)      |
|           | 48          | 41          | 96          | 88          | 133         | 127         | 75          | 72          | 34          | 32          | 5           | 5           |
| Cancer    | (34.3)      | (29.3)      | (31.4)      | (28.8)      | (29.6)      | (28.3)      | (20)        | (19.2)      | (15.1)      | (14.2)      | (6.3)       | (6.3)       |
|           |             |             | 14          | 5           | 33          | 12          | 42          | 17          | 29          | 9           | 13          | 7           |
| Dementia  | 0.0         | 0.0         | (4.6)       | (1.6)       | (7.3)       | (2.7)       | (11.2)      | (4.5)       | (12.9)      | (4)         | (16.5)      | (8.9)       |
|           |             |             |             |             |             | 50          |             | 39          |             | 23          |             |             |
| Stroke    | 7 (5)       | 6 (4.3)     | 26 (8.5)    | 21 (6.9)    | 36 (8)      | (11.1)      | 27 (7.2)    | (10.4)      | 17 (7.6)    | (10.2)      | 6 (7.6)     | 7 (8.9)     |
| Chr Pulm  | 7 (5)       | 9 (6.4)     | 22 (7.2)    | 18 (5.9)    | 25 (5.6)    | 24 (5.3)    | 18 (4.8)    | 10 (2.7)    | 16 (7.1)    | 11 (4.9)    | 3 (3.8)     | 0.0         |
| Pneumonia | 3 (3)       | 3 (2.1)     | 8 (2.6)     | 17 (5.6)    | 24 (5.3)    | 21 (4.7)    | 24 (6.4))   | 24 (6.4)    | 20 (8.9)    | 21 (9.3)    | 9 (11.4)    | 7 (8.9)     |
| Other     | 18          | 29          | 48          | 66          | 71          | 92          | 85          | 105         | 51          | 63          | 14          | 23          |

(12.9) (20.7) (15.6) (21.5) (15.9) (20.5) (22.7) (28) (22.6) (28) (17.7) (29.1)

Appendix Table 1 Cont'd

| Women     | N=103   |         | N=278    |          | N=471    |          | N=403    |          | N=267    |          | N=98    |         |
|-----------|---------|---------|----------|----------|----------|----------|----------|----------|----------|----------|---------|---------|
|           | CHS     | ICD     | CHS      | ICD      | CHS      | ICD      | CHS      | ICD      | CHS      | ICD      | CHS     | ICD     |
|           | N(%)    | N(%)    | N(%)     | N(%)     | N(%)     | N(%)     | N(%)     | N(%)     | N(%)     | N(%)     | N(%)    | N(%)    |
|           | 25      | 22      | 58       | 54       | 109      | 123      | 96       | 116      | 57       | 69       | 20      | 24      |
| CHD       | (24.3)  | (21.4)  | (20.9)   | (19.5)   | (23.1)   | (25.9)   | (23.8)   | (28.8)   | (21.3)   | (25.9)   | (20.4)  | (24.5)  |
|           | 47      | 45      | 87       | 90       | 128      | 128      | 60       | 57       | 38       | 35       |         |         |
| Cancer    | (45.6)  | (43.7)  | (31.3)   | (32.4)   | (27.2)   | (27.2)   | (14.9)   | (14.1)   | (14.2)   | (13.1)   | 9 (9.2) | 7 (7.1) |
|           |         |         |          |          |          |          | 85       |          | 54       |          | 18      |         |
| Dementia  | 1 (1)   | 1 (1)   | 13 (4.7) | 4 (1.4)  | 38 (8.1) | 14 (3)   | (21.2)   | 26 (6.5) | (20.2)   | 17 (6.4) | (18.4)  | 1 (1)   |
|           |         |         | 32       |          | 50       | 53       | 44       | 48       |          | 38       | 10      | 15      |
| Stroke    | 4 (3.9) | 6 (5.8) | (11.5)   | 26 (9.4) | (10.6)   | (11.3)   | (10.9)   | (11.9)   | 26 (9.7) | (14.2)   | (10.2)  | (15.3)  |
| Chr Pulm  | 5 (4.9) | 3 (2.9) | 17 (6.1) | 13 (4.7) | 34 (7.2) | 23 (4.9) | 15 (3.7) | 15 (3.7) | 13 (4.9) | 5 (1.9)  | 7 (7.4) | 4 (4.1) |
|           |         |         |          |          |          |          |          |          |          | 27       | 11      | 10      |
| Pneumonia | 0.0     | 2 (1.9) | 8 (2.9)  | 6 (2.2)  | 17 (3.6) | 14 (3)   | 25 (6.2) | 33 (8.2) | 12 (4.5) | (10.1)   | (11.2)  | (10.2)  |
|           | 21      | 24      | 63       | 85       | 95       | 116      |          | 108      | 67       | 76       | 23      | 37      |
| Other     | (20.4)  | (23.3)  | (22.6)   | (30.4)   | (20.2)   | (24.7)   | 78 19.4) | (26.8)   | (25.2)   | (28.4)   | (23.5)  | (37.8)  |

Appendix Table 2. Percent Age and Race\* Specific Underlying Cause of Death by CHS and Nosologist

|           | 65-74 years |         | 75-79 years |          | 80-84 years |          | 85-89 years |          | 90-94 years |          | 95+ years |         |
|-----------|-------------|---------|-------------|----------|-------------|----------|-------------|----------|-------------|----------|-----------|---------|
| White     | N=193       |         | N=462       |          | N=791       |          | N=687       |          | N=438       |          | N=153     |         |
|           | CHS         | ICD     | CHS         | ICD      | CHS         | ICD      | CHS         | ICD      | CHS         | ICD      | CHS       | ICD     |
|           | N(%)        | N(%)    | N(%)        | N(%)     | N(%)        | N(%)     | N(%)        | N(%)     | N(%)        | N(%)     | N(%)      | N(%)    |
|           | 63          | 57      | 118         | 118      | 201         | 217      | 183         | 205      | 103         | 125      | 41        | 48      |
| CHD       | (32.6)      | (29.6)  | (25.5)      | (25.5)   | (25.4)      | (27.4)   | (26.6)      | (29.9)   | (23.5)      | (28.5)   | (26.8)    | (31.4)  |
|           | 77          | 69      | 144         | 143      | 227         | 219      | 119         | 112      | 62          | 60       |           | 11      |
| Cancer    | (39.9)      | (35.8)  | (31.2)      | (31)     | (28.7)      | (27.7)   | (17.3)      | (16.3)   | (14.2)      | (13.7)   | 12 (7.8)  | (7.2)   |
|           |             |         |             |          |             |          |             |          | 77          |          |           |         |
| Dementia  | 1 (0.5)     | 1 (0.5) | 20 (4.3)    | 9 (1.9)  | 59 (7.5)    | 23 (2.9) | 110 (16)    | 38 (5.5) | (17.6)      | 23 (5.3) | 26 (17)   | 6 (3.9) |
|           |             |         |             |          |             |          |             | 71       |             | 55       |           | 19      |
| Stroke    | 7 (3.6)     | 9 (4.7) | 45 (9.7)    | 40 (8.7) | 76 (9.6)    | 87 (11)  | 60 (8.7)    | (10.3)   | 38 (8.7)    | (12.6)   | 12 (7.8)  | (12.4)  |
|           |             | 11      |             |          |             |          |             |          |             |          |           |         |
| Chr Pulm  | 10 (5.2)    | (5.7)   | 26 5.6      | 20 (4.3) | 54 (6.8)    | 43 (5.4) | 33 (4.8)    | 24 (3.5) | 24 (5.5)    | 13 (3)   | 9 (5.9)   | 3 (2)   |
|           |             |         |             |          |             |          |             |          |             |          | 18        | 16      |
| Pneumonia | 3 (1.6)     | 5 (2.6) | 14 (3)      | 19 (4.1) | 37 (4.7)    | 31 (3.9) | 43 (6.3)    | 50 (7.3) | 29 (6.6)    | 42 (9.6) | (11.8)    | (10.5)  |
| Other     | 39          | 41      | 95          | 113      | 137         | 171      | 139         | 187      | 105         | 120      | 35        | 50      |

|                         | (20.2)   | (21.1)  | (20.7)  | (24.5)   | (17.3)   | (21.7)  | (20.3)    | (27.2)  | (23.9)  | (27.3)  | (22.9)   | (32.6)  |
|-------------------------|----------|---------|---------|----------|----------|---------|-----------|---------|---------|---------|----------|---------|
| Appendix Table 2 Cont'd | N=48     |         | N=116   |          | N=125    |         | N=85      |         | N=50    |         | N=21     |         |
| Black                   | CHS      | ICD     | CHS     | ICD      | CHS      | ICD     | CHS       | ICD     | CHS     | ICD     | CHS      | ICD     |
|                         | N(%)     | N(%)    | N(%)    | N(%)     | N(%)     | N(%)    | N(%)      | N(%)    | N(%)    | N(%)    | N(%)     | N(%)    |
|                         | 18       | 16      | 31      | 26       | 34       | 27      |           |         |         |         |          |         |
| CHD                     | (37.5)   | (33.3)  | (26.7)  | (22.4)   | (27.2)   | (21.6)  | 15 (17.6) | 17 (20) | 12 (24) | 10 (20) | 8 (38.1) | 4 (19)  |
|                         | 17       | 16      | 35      | 31       | 32       | 34      |           | 15      |         |         |          |         |
| Cancer                  | (35.4)   | (33.3)  | (30.2)  | (26.7)   | (25.6)   | (27.2)  | 14 (16.5) | (17.6)  | 9 (18)  | 6 (12)  | 2 (9.5)  | 1 (4.8) |
|                         |          |         |         |          |          |         | 15 (      |         |         |         |          |         |
| Dementia                | 0.0      | 0.0     | 7 (6)   | 0.0      | 12 (9.6) | 3 (2.4) | (17.6))   | 4 (4.7) | 4 (8)   | 3 (6)   | 4 (19)   | 1 (4.8) |
|                         |          |         | 13      |          |          |         |           | 16      |         |         |          | 3       |
| Stroke                  | 4 (8.3)  | 3 (6.3) | (11.2)  | 7 (6)    | 10 (8)   | 15 (12) | 11 (12.9) | (18.8)  | 5 (10)  | 6 (12)  | 4 (19)   | (14.3)  |
|                         |          |         | 12      |          |          |         |           |         |         |         |          |         |
| Chr Pulm                | 2 (4.2)  | 1 (2.1) | (10.3)  | 10 (8.6) | 5 (4)    | 4 (3.2) | 0.0       | 0.0     | 5 (10)  | 2 (4)   | 1 (4.8)  | 1 (4.8) |
| Pneumonia               | 0.0      | 0.0     | 2 (1.7) | 4 (3.4)  | 4 (3.2)  | 4 (3.2) | 6 (7.1)   | 7 (8.2) | 3 (6)   | 4 (8)   | 0.0      | 1 (4.8) |
|                         |          |         | 16      | 38       | 28       | 38      |           | 26      |         |         |          | 10      |
| Other                   | 7 (14.6) | 12 (25) | (13.9)  | (32.9)   | (22.4)   | (30.4)  | 24 (28.3) | (30.7)  | 12 (24) | 19 (38) | 2 (9.6)  | (47.8)  |

\* Total self-reported race as white or black, N=3168

CHS=Cardiovascular Health Study, ICD=International Classification of Diseases, CHD=Coronary Heart Disease, Chr Pulm=Chronic Obstructive Pulmonary Disease

Appendix Table 3. CHS and Nosologist Underlying Cause of Death, N=3194

| CHS Cause of death by Central Adjudication                    | Nosologist Cause of Death by ICD-9 Code |                              |                    |                     |                          |                        |                  |                |                  |                        |                            |                 |                       |                          |                         |               |                       |       |             |
|---------------------------------------------------------------|-----------------------------------------|------------------------------|--------------------|---------------------|--------------------------|------------------------|------------------|----------------|------------------|------------------------|----------------------------|-----------------|-----------------------|--------------------------|-------------------------|---------------|-----------------------|-------|-------------|
|                                                               | CHD                                     |                              | Cerebro-vascular   | Other               | Other                    |                        |                  |                | COPD             |                        |                            | renal           | GI                    | Diabetes &               | Failure                 |               |                       | Total |             |
|                                                               | 410-411, 413-414, 429                   | Congestive Heart Failure 428 | 430-434,436-438    | Athero 440-444, 557 | Cardiac 390-398, 415-427 | Dementia 290, 294, 331 | Parkin- sons 332 | Cancer 140-208 | 490-496, 518-519 | pneumonia 480-486, 507 | sepsis- urosepsis 038, 599 | failure 580-593 | Liver disease 570-579 | disease 530-540, 555-569 | other metabolic 250-279 | to thrive 783 | blood disease 280-289 | Other | (Column %)  |
| Atherosclerotic Coronary Heart Disease (category 1)           | 569*                                    | 43*                          | 24                 | 20                  | 51                       | 4                      | 0                | 8              | 11               | 8                      | 1                          | 11              | 1                     | 2                        | 36                      | 0             | 0                     | 43    | 832 (26.1%) |
|                                                               | k=0.61 (0.58-0.65)                      | k=0.05 (0.03-0.07)           |                    |                     |                          |                        |                  |                |                  |                        |                            |                 |                       |                          |                         |               |                       |       |             |
| Cerebrovascular Disease (category 2)                          | 26                                      | 3                            | 195                | 1                   | 7                        | 3                      | 0                | 8              | 3                | 14                     | 3                          | 2               | 1                     | 1                        | 6                       | 0             | 0                     | 12    | 285 (8.9%)  |
|                                                               |                                         |                              | k=0.59 (0.55-0.64) |                     |                          |                        |                  |                |                  |                        |                            |                 |                       |                          |                         |               |                       |       |             |
| Atherosclerotic, not coronary or cerebrovascular (category 3) | 17                                      | 2                            | 2                  | 34                  | 2                        | 0                      | 0                | 0              | 0                | 1                      | 3                          | 5               | 0                     | 0                        | 3                       | 0             | 0                     | 4     | 73 (2.3%)   |
|                                                               |                                         |                              |                    | k=0.43 (0.33-0.53)  |                          |                        |                  |                |                  |                        |                            |                 |                       |                          |                         |               |                       |       |             |
| Other cardiovascular, not coronary heart disease (category 4) | 20                                      | 7                            | 4                  | 2                   | 41                       | 1                      | 0                | 1              | 1                | 3                      | 1                          | 1               | 0                     | 0                        | 1                       | 0             | 0                     | 8     | 91 (2.8%)   |
|                                                               |                                         |                              |                    |                     | k=0.33 (0.25-0.41)       |                        |                  |                |                  |                        |                            |                 |                       |                          |                         |               |                       |       |             |
| Dementia (category 5/group 2)                                 | 44                                      | 2                            | 44                 | 3                   | 4                        | 97                     | 3                | 3              | 6                | 50                     | 10                         | 8               | 1                     | 8                        | 16                      | 0             | 0                     | 41    | 340 (10.6%) |
|                                                               |                                         |                              |                    |                     |                          | k=0.40 (0.34-0.45)     |                  |                |                  |                        |                            |                 |                       |                          |                         |               |                       |       |             |

Appendix Table 3 Cont'd

|                                                                   |    |   |    |   |    |   |                             |                              |                             |                             |                             |                             |                             |   |    |   |   |    |                |
|-------------------------------------------------------------------|----|---|----|---|----|---|-----------------------------|------------------------------|-----------------------------|-----------------------------|-----------------------------|-----------------------------|-----------------------------|---|----|---|---|----|----------------|
| Parkinsons<br>(category 5/group 4)                                | 2  | 1 | 11 | 0 | 1  | 1 | 18<br>k=0.47<br>(0.33-0.62) | 1                            | 2                           | 5                           | 2                           | 0                           | 0                           | 0 | 1  | 0 | 0 | 4  | 49<br>(1.5%)   |
| Cancer (category 5/group 20)                                      | 16 | 4 | 2  | 3 | 2  | 0 | 0                           | 692<br>k=0.91<br>(0.89-0.93) | 4                           | 9                           | 2                           | 1                           | 0                           | 4 | 4  | 0 | 5 | 12 | 760<br>(23.8%) |
| COPD & other respiratory<br>not pneumonia<br>(category 5/group 7) | 17 | 2 | 4  | 2 | 11 | 0 | 0                           | 5                            | 95<br>k=0.58<br>(0.51-0.65) | 13                          | 1                           | 5                           | 0                           | 0 | 1  | 0 | 0 | 26 | 182<br>(5.7%)  |
| Pneumonia (category 5/group 8)                                    | 21 | 6 | 16 | 1 | 7  | 3 | 2                           | 4                            | 7                           | 67<br>k=0.35<br>(0.29-0.42) | 2                           | 3                           | 4                           | 2 | 3  | 0 | 1 | 12 | 161<br>(5.0%)  |
| Sepsis/urosepsis (category 5/group 11)                            | 12 | 1 | 2  | 2 | 2  | 1 | 0                           | 0                            | 2                           | 4                           | 15<br>k=0.25<br>(0.14-0.36) | 7                           | 1                           | 3 | 5  | 0 | 1 | 10 | 68<br>(2.1%)   |
| renal failure, acute &/or<br>chronic (category 5/group 14)        | 8  | 2 | 2  | 0 | 5  | 0 | 0                           | 0                            | 0                           | 3                           | 1                           | 12<br>k=0.19<br>(0.09-0.29) | 0                           | 1 | 12 | 0 | 0 | 11 | 57<br>(1.8%)   |
| Liver disease (category 5/group 12)                               | 0  | 1 | 0  | 1 | 0  | 0 | 0                           | 0                            | 0                           | 1                           | 0                           | 0                           | 11<br>k=0.42<br>(0.25-0.59) | 0 | 1  | 0 | 0 | 2  | 17<br>(0.5%)   |

Appendix Table 3 Cont'd

|                                                           |                |              |                |              |               |               |              |                |               |               |              |              |              |              |                             |                            |              |                            |      |               |
|-----------------------------------------------------------|----------------|--------------|----------------|--------------|---------------|---------------|--------------|----------------|---------------|---------------|--------------|--------------|--------------|--------------|-----------------------------|----------------------------|--------------|----------------------------|------|---------------|
| GI: bleed, perf bowel, pancreatitis (category 5/group 13) | 14             | 1            | 3              | 7            | 3             | 0             | 0            | 2              | 3             | 2             | 2            | 2            | 2            | 14           | 21<br>k=0.31<br>(0.20-0.41) | 1                          | 0            | 0                          | 12   | 87<br>(2.7%)  |
| Diabetes & other metabolic (category 5/group 15)          | 0              | 1            | 0              | 0            | 0             | 0             | 0            | 0              | 0             | 0             | 0            | 0            | 0            | 0            | 0                           | 5<br>k=0.09<br>(0.02-0.16) | 0            | 0                          | 1    | 7<br>(0.2%)   |
| Failure to thrive (category 5/group 18)                   | 5              | 2            | 5              | 0            | 0             | 1             | 1            | 1              | 0             | 1             | 1            | 0            | 0            | 0            | 0                           | 0                          | 0            | 1                          | 1    | 19<br>(0.6%)  |
| Blood disease (category 5/group 19)                       | 0              | 0            | 0              | 1            | 1             | 0             | 0            | 1              | 0             | 0             | 0            | 0            | 0            | 0            | 0                           | 0                          | 0            | 7<br>k=0.54<br>(0.30-0.77) | 1    | 11<br>(0.3%)  |
| Other (category 5/all others)                             | 25             | 3            | 18             | 2            | 5             | 2             | 2            | 1              | 1             | 4             | 3            | 2            | 2            | 3            | 5                           | 0                          | 0            | 0                          | 77   | 155<br>(4.8%) |
| Total (row %)                                             | 796<br>(24.9%) | 81<br>(2.5%) | 332<br>(10.4%) | 79<br>(2.5%) | 142<br>(4.4%) | 113<br>(3.5%) | 26<br>(0.8%) | 727<br>(22.8%) | 135<br>(4.2%) | 185<br>(5.8%) | 47<br>(1.5%) | 59<br>(1.8%) | 35<br>(1.1%) | 45<br>(1.4%) | 100<br>(3.1%)               | 0                          | 15<br>(0.5%) | 277<br>(8.7%)              | 3194 |               |
| * combined CHD/CHF<br>k=0.6127                            |                |              |                |              |               |               |              |                |               |               |              |              |              |              |                             |                            |              |                            |      |               |
